# Supplementary material for: Efficient and selective catalytic hydroxylation of unsaturated plant oils: a novel method for producing anti-pathogens
Source: PubMed Central journal article supplement (PMC8008645; doi:10.1186/s13065-021-00748-z), 2021-03-29
Supplement: 13065_2021_748_MOESM1_ESM.pdf [file 13065_2021_748_MOESM1_ESM.pdf]

## Electronic Supplementary Materials

### Efficient and selective catalytic hydroxylation of unsaturated plant oils; a novel method for producing anti-pathogens

Ahmed M. Senan,<sup>\*,1,2</sup> Binru Yin,<sup>1</sup> Yaoyao Zhang,<sup>1</sup> Mustapha M. Nasiru,<sup>1</sup> Yong-Mei Lyu,<sup>1</sup> Muhammad Umair,<sup>1</sup> Javaid Akhter Bhat,<sup>1</sup> Sicheng Zhang,<sup>2</sup> and Li Liu <sup>\*,1</sup>

#### Contents:

**Figure S1** The quantification products by <sup>1</sup>H NMR Spectrum; Linoleic acid obtained as main product of ML hydroxylation with (Na<sub>2</sub>S<sub>2</sub>O<sub>8</sub>) alone as catalyst

**Figure S2** <sup>1</sup>H NMR spectrum of conjugated hydroxy methyl linoleate (isolated product 1)

**Figure S3** <sup>1</sup>H NMR spectrum of conjugated hydroxy methyl linoleate CHLM (Reaction Mixture),

**Figure S4** <sup>1</sup>H NMR Spectrum of Saturated Ester

**Figure S5** <sup>1</sup>H NMR spectrum of original methyl linoleate

**Figure S6** <sup>13</sup>C NMR spectrum of isolated product in CDCl<sub>3</sub> (after removal of the solvent MeCN/H<sub>2</sub>O)

**Figure S7.** MALDITOF –mass spectroscopy employed for determining the mixture of conjugated hydroxy methyl linoleate CHML after reaction time 24 h

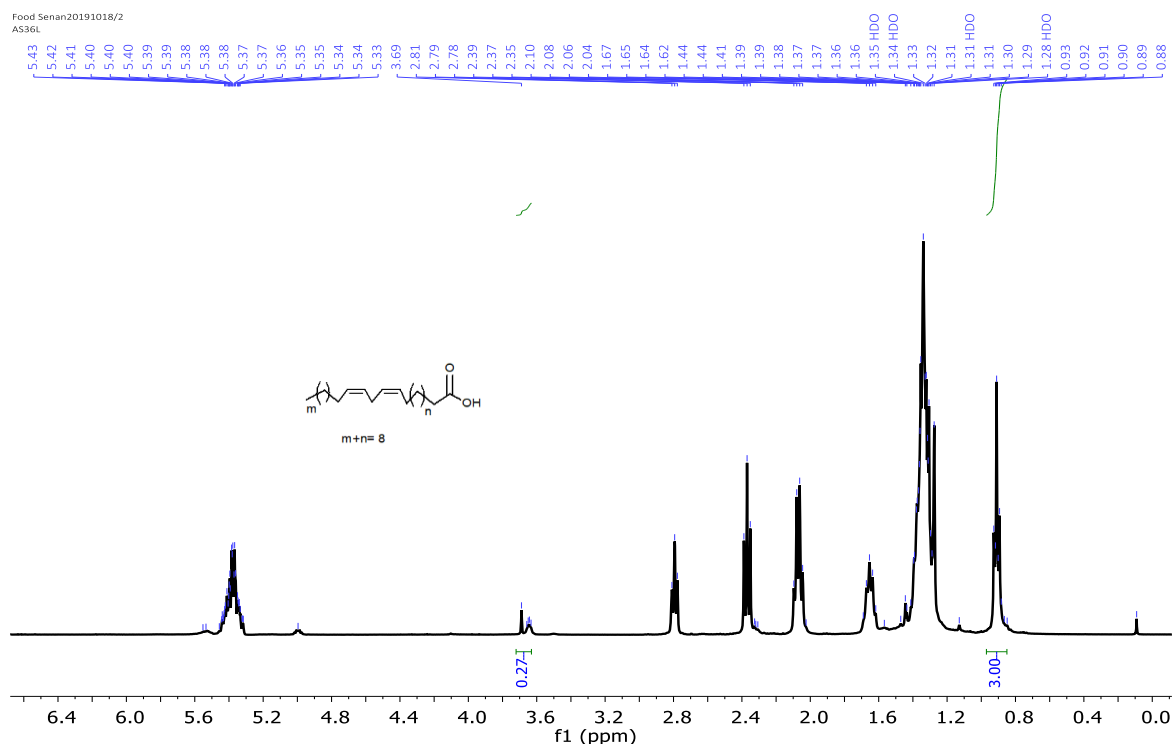

**Figure S1** The quantification products by  $^1\text{H}$  NMR Spectrum; Linoleic acid obtained as main product of ML hydroxylation with  $(\text{Na}_2\text{S}_2\text{O}_8)$  alone as catalyst

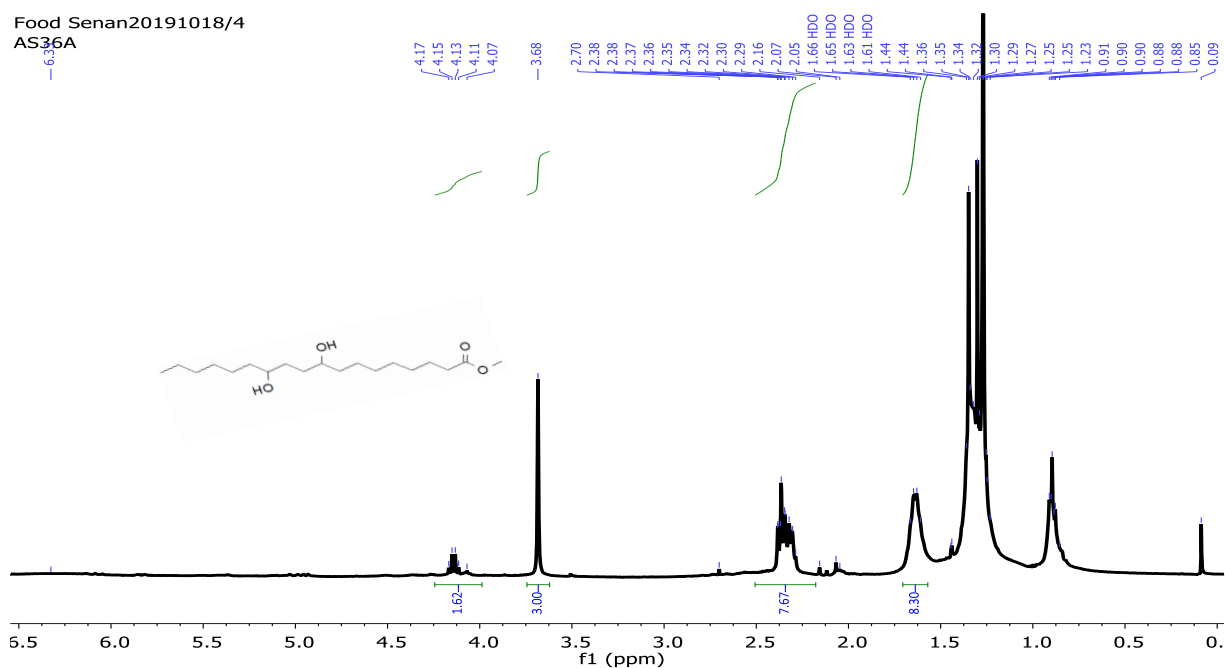

**Figure S2**  $^1\text{H}$  NMR spectrum of conjugated hydroxy methyl linoleate (isolated product 1)

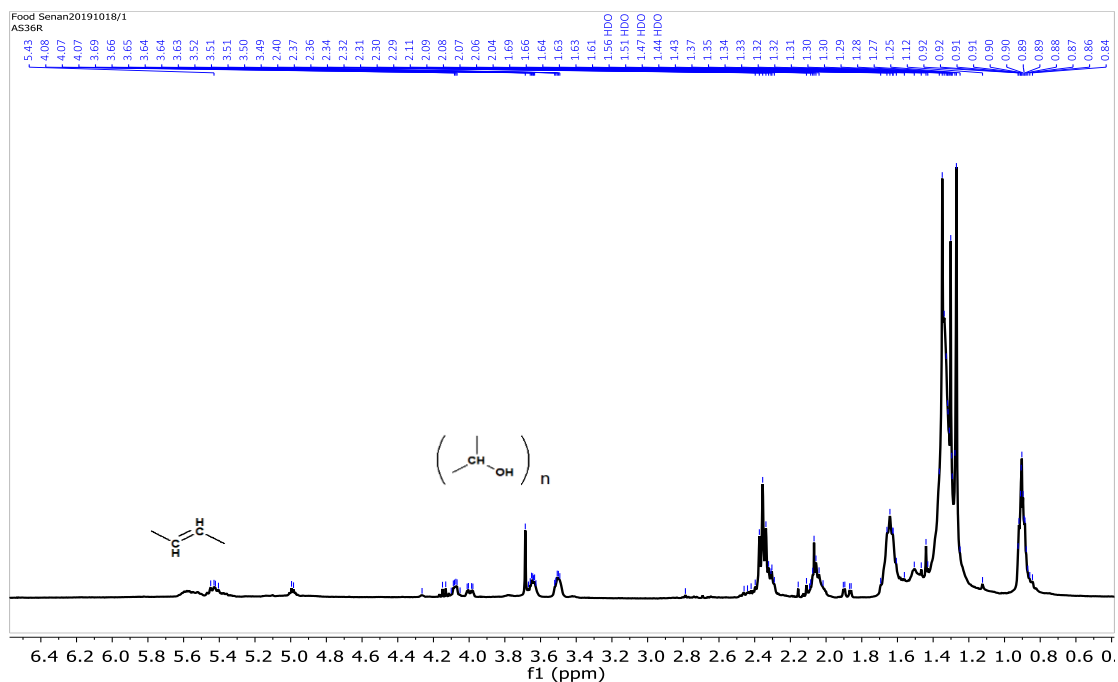

**Figure S3**  $^1\text{H}$  NMR spectrum of conjugated hydroxy methyl linoleate CHLM (Reaction Mixture),

n=5

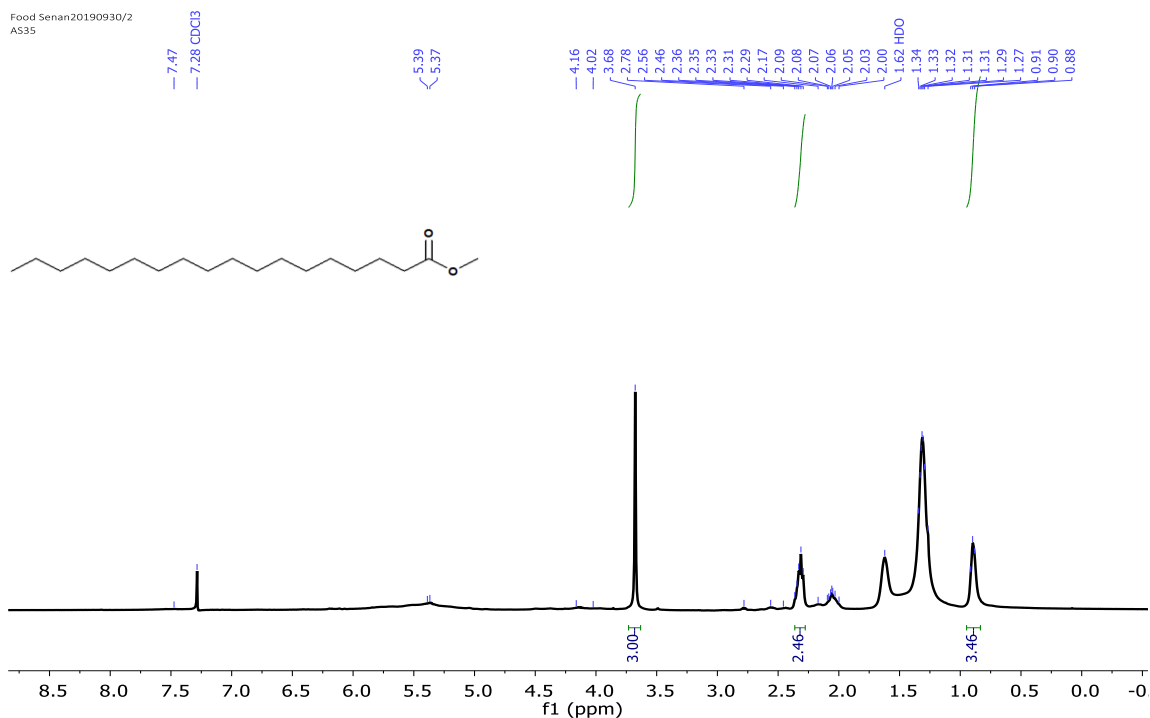

Figure S4 <sup>1</sup>H NMR Spectrum of Saturated Ester

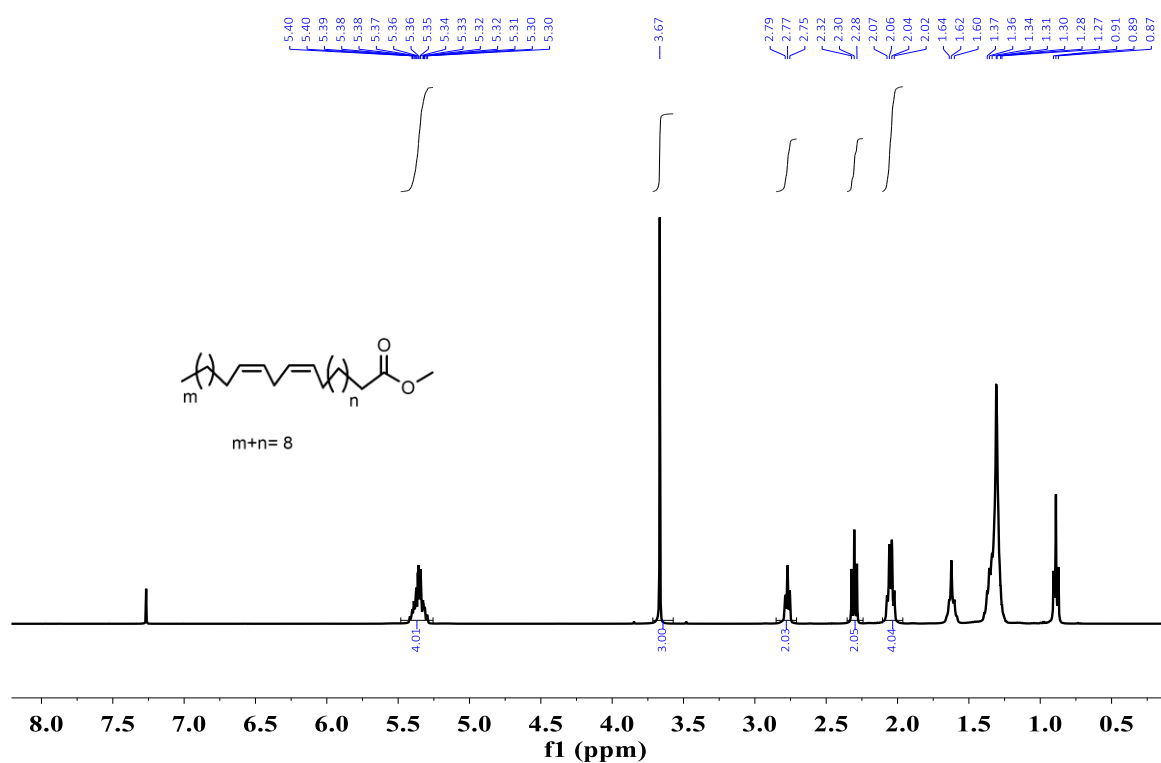

Figure S5 <sup>1</sup>H NMR spectrum of original methyl linoleate

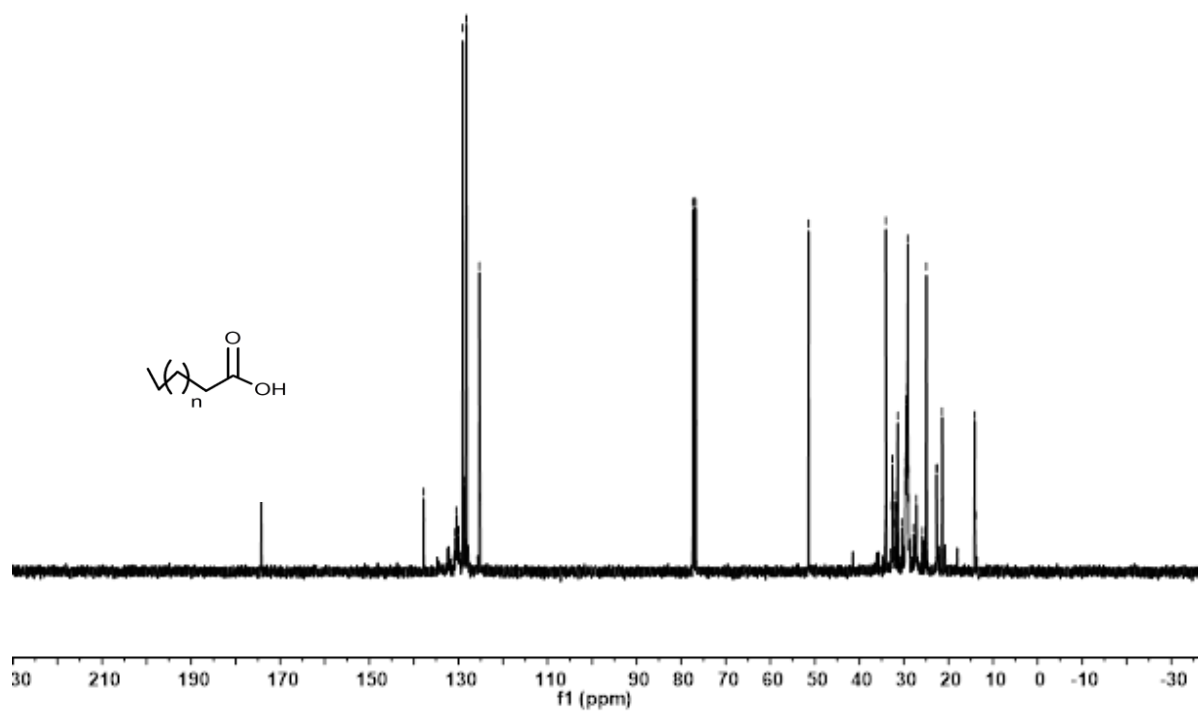

**Figure S6**  $^{13}\text{C}$  NMR spectrum of isolated product in  $\text{CDCl}_3$  (after removal of the solvent  $\text{MeCN}/\text{H}_2\text{O}$ )

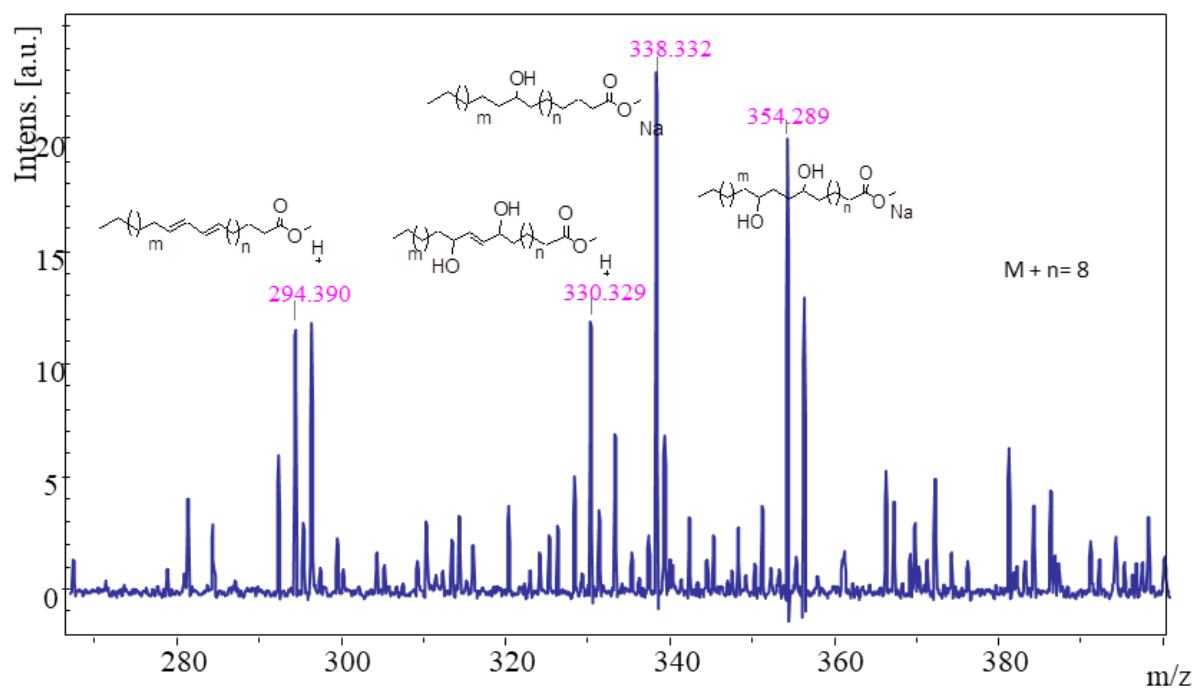

**Figure S7.** MALDI-TOF mass spectroscopy employed for determining the mixture of conjugated hydroxy methyl linoleate CHML after reaction time 24 h
